# Supplementary material
Source: PubMed Central journal article supplement (PMC7613627)
Supplement: EMS151389-supplement-Supplementary_Figures.pdf [file EMS151389-supplement-Supplementary_Figures.pdf]

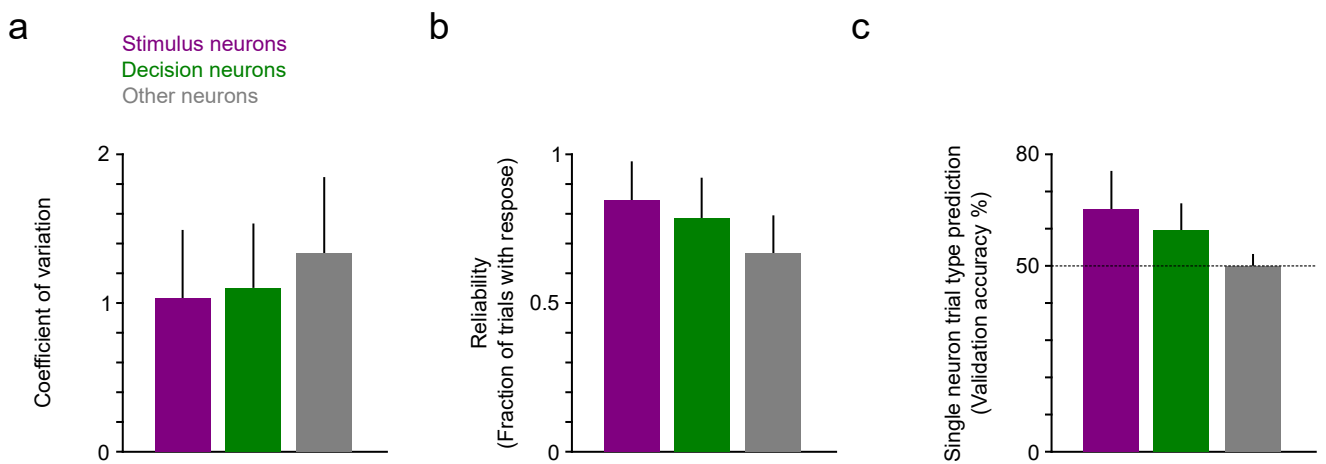

**Supplementary Figure 1. Response reliability in stimulus, decision and other neurons.**

a) Coefficient of variation of stimulus, decision, and other neurons. b) Response reliability measured as fraction of trials with a response in stimulus, decision, and other neurons. c) Validation accuracy of a classifier trained to predict trial type using single neuron activity for stimulus, decision, and other neurons. Other neurons are neurons that are neither stimulus, decision or trial-coding neurons. All subfigures: Mean  $\pm$  s.d.,  $n = 4568$  stimulus neurons,  $n = 2249$  decision neurons,  $n = 34245$  other neurons, two-sided Wilcoxon rank sum test, all comparisons are significant with  $p < 0.0001$ .

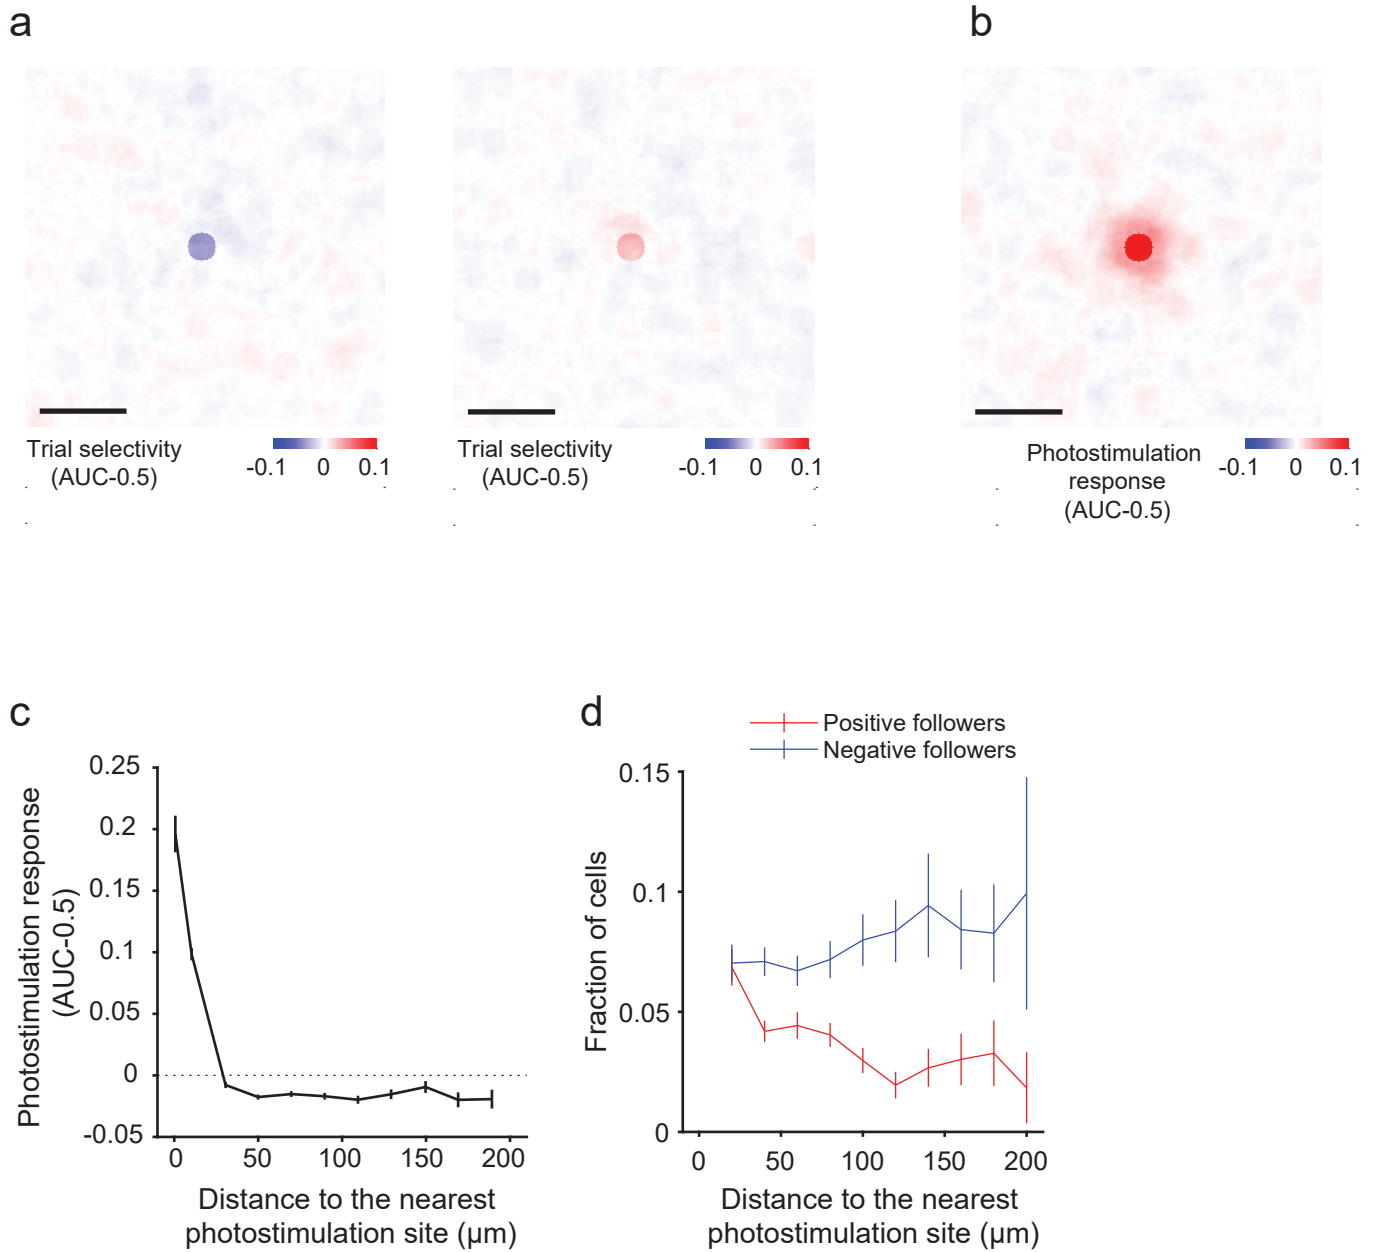

**Supplementary Figure 2. Functional and spatial specificity of photostimulation.**

(a) Mean trial selectivity of all neurons aligned so Target S (left) or Target R (right) is centered. (b) Mean photostimulation response of all neurons aligned so the targeted neuron is centered. Scale bars, 50  $\mu\text{m}$ . Spatial footprints of neurons were simplified to circular masks 20 pixels (16  $\mu\text{m}$ ) in diameter. (c) Photostimulation response versus lateral distance to the nearest photostimulation site.  $n = 16096$  neurons, 40 sessions, 7 mice. (d) Fraction of positive and negative followers versus lateral distance to the nearest photostimulation site.  $N = 80$  target ensembles, 40 sessions, 7 mice. c-d, data are presented as mean  $\pm$  s.e.m; errorbars are s.e.m.

a

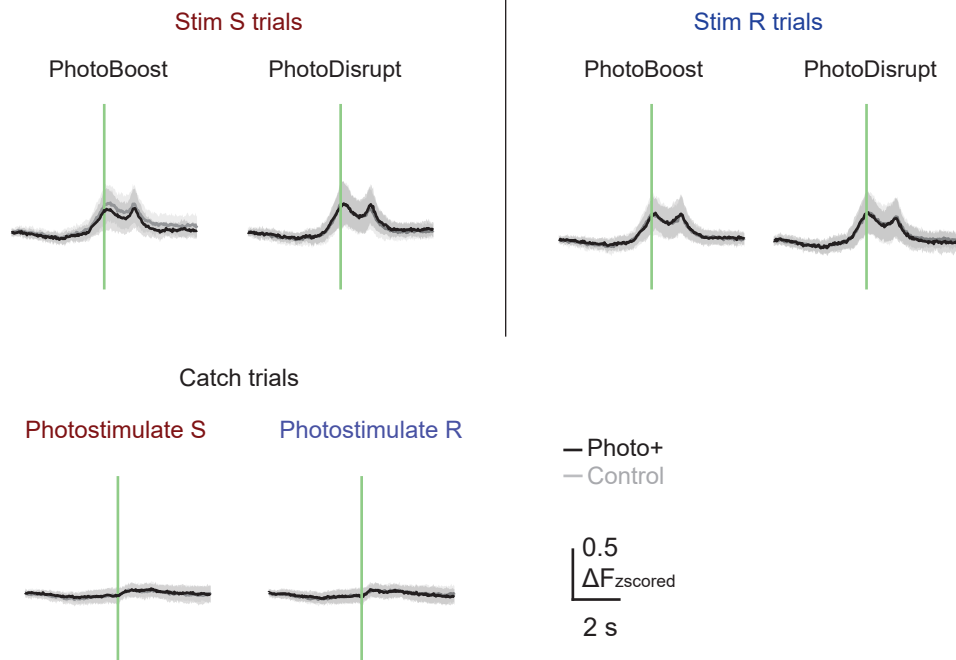

b

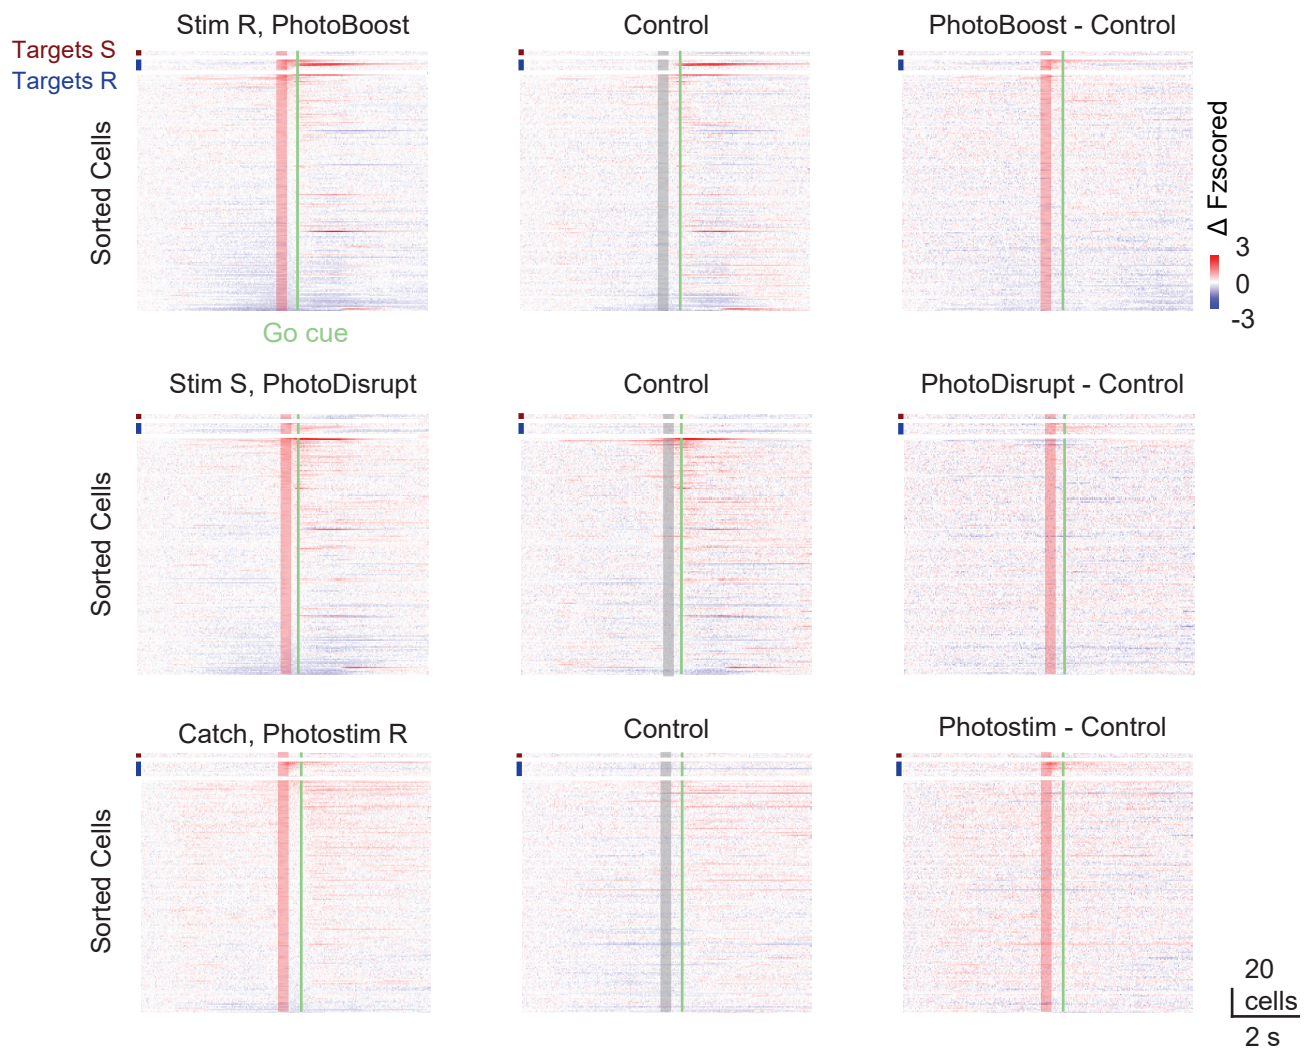

**Supplementary Figure 3. Calcium activity of background neurons during photostimulation.**

(a) Calcium time courses of background neurons during different trial types (mean  $\pm$  s.d., same experiments as in Figure 7b and Figure 6e).  
 (b) Average calcium activity of all neurons ( $n = 191$ ) in the example FOV in response to Photostimulation R during PhotoBoost (top), PhotoDisrupt (Middle) and Catch (bottom) trials. Red (grey) vertical bars mark the average frame range affected by (sham) stimulation artefact.

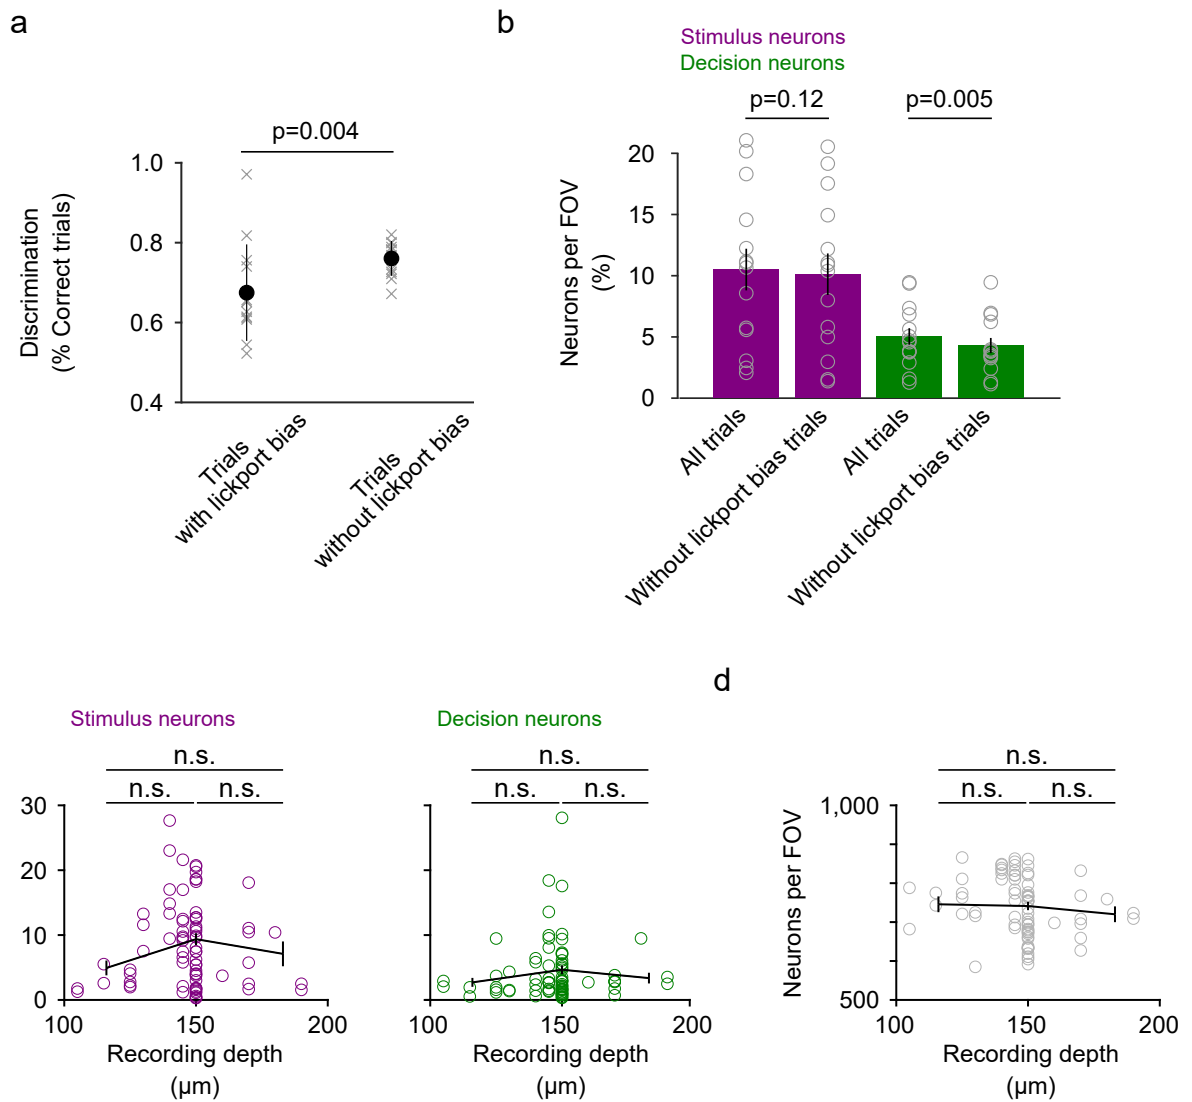

**Supplementary Figure 4. Behavioural performance and neuron identification after removal of lickport biased trials and depth distribution of stimulus and decision neurons.**

a) Behavioral discrimination (Correct trials / (Correct + Incorrect trials)) across mice using only trials with or without lickport bias. Mean  $\pm$  s.d.,  $n = 13$  mice, grey Xs denote individual mice, two-sided Wilcoxon rank sum test. b) Percentage of stimulus and decision neurons per FOV using either all Correct and Incorrect trials ('All trials') or only Correct and Incorrect trials without a lickport bias ('Without lickport bias trials'). Mean  $\pm$  s.e.m.,  $n = 14$  FOVs (13 mice), two-sided Wilcoxon signed-rank test. c) Percentage of stimulus and decision neurons per FOV against recording depth ( $\mu\text{m}$  below the surface). Mean  $\pm$  s.e.m.,  $n = 78$  FOVs, two-sided Wilcoxon rank sum test. d) Neurons registered per FOV against recording depth ( $\mu\text{m}$  below the surface). Mean  $\pm$  s.e.m.,  $n = 78$  FOVs, two-sided Wilcoxon rank sum test.
